# Supplementary material for: FOXP3 Regulates Sensitivity of Cancer Cells to Irradiation by Transcriptional Repression of BRCA1
Source: Oxford University Press journal article supplement (doi:10.1158/0008-5472.can-12-2481), 2013-01-14
Supplement: 00085472can122481-sup-supplementary_table_s1_xls_file_-_40k.xlsx [file 00085472can122481-sup-supplementary_table_s1_xls_file_-_40k.xlsx]

## Sheet: Sheet2
Supplemental Table S1. mRNA expression profile of DNA repair-associated genes
Symbol	Name	FOXP3 (-) average	FOXP3 (+) average	fold change	p-value
DTL	denticleless homolog (Drosophila)	609.845	265.746	0.43576	0.000394917
BLM	Bloom syndrome	342.864	166.41	0.485352	8.07565e-06
RBM14	RNA binding motif protein 14	1745.67	893.355	0.511755	7.28111e-05
XRCC2	X-ray repair complementing defective repair in Chinese hamster cells 2	106.792	55.2382	0.517251	0.00248872
RAD51	RAD51 homolog (RecA homolog, E. coli) (S. cerevisiae)	1056.29	553.397	0.523908	2.33656e-05
EXO1	exonuclease 1	459.999	241.391	0.524763	1.70894e-05
FANCB	Fanconi anemia, complementation group B	42.8963	22.5157	0.524886	7.32636e-05
CHAF1A	chromatin assembly factor 1, subunit A (p150)	500.569	263.439	0.526278	0.00034763
RFC4	replication factor C (activator 1) 4, 37kDa	1241	656.919	0.529347	0.000112484
BRCA1	breast cancer 1, early onset	666.396	369.95	0.55515	0.000465852
RAD54B	RAD54 homolog B (S. cerevisiae)	880.074	495.092	0.562557	9.61286e-05
RAD54L	RAD54-like (S. cerevisiae)	474.627	270.817	0.570588	2.12628e-05
NFKBIL2	nuclear factor of kappa light polypeptide gene enhancer in B-cells inhibitor-like 2	391.699	225.979	0.57692	0.00031081
POLD1	polymerase (DNA directed), delta 1, catalytic subunit 125kDa	1033.6	606.922	0.587193	0.000573148
RFWD3	ring finger and WD repeat domain 3	598.113	369.626	0.617987	0.00173787
CHAF1B	chromatin assembly factor 1, subunit B (p60)	397.044	246.415	0.620622	0.000185371
XRCC4	X-ray repair complementing defective repair in Chinese hamster cells 4	272.889	170.204	0.623712	0.000324593
BRCA2	breast cancer 2, early onset	158.237	98.7836	0.624275	0.00113636
DDB2	damage-specific DNA binding protein 2, 48kDa	937.614	586.842	0.625888	0.000157933
ATRIP	ATR interacting protein	217.83	137.19	0.629803	0.000444337
LIG1	ligase I, DNA, ATP-dependent	1420.21	926.614	0.652448	0.00604575
CDCA5	cell division cycle associated 5	1772.53	1163.94	0.656654	0.000286088
XRCC3	X-ray repair complementing defective repair in Chinese hamster cells 3	147.99	98.8015	0.667622	0.000609119
RFC3	replication factor C (activator 1) 3, 38kDa	2431.2	1625.88	0.668758	0.000670476
FEN1	flap structure-specific endonuclease 1	2027.48	1367.43	0.674449	0.000155473
MRE11A	MRE11 meiotic recombination 11 homolog A (S. cerevisiae)	495.362	335.074	0.676423	0.0113661
C9orf119	chromosome 9 open reading frame 119	933.183	632.071	0.677328	0.000744168
OGG1	8-oxoguanine DNA glycosylase	306.554	208.08	0.678771	0.0044453
PCNA	proliferating cell nuclear antigen	4242.52	2904.55	0.684628	0.00220798
TP53	tumor protein p53	876.363	602.476	0.687473	0.0255217
FANCG	Fanconi anemia, complementation group G	1596.31	1097.56	0.687564	9.77865e-06
UHRF1	ubiquitin-like, containing PHD and RING finger domains, 1	2421.77	1669.82	0.689504	0.00790483
XPC	xeroderma pigmentosum, complementation group C	878.747	607.525	0.691353	7.26206e-05
CHEK1	CHK1 checkpoint homolog (S. pombe)	513.557	356.831	0.694823	0.00124946
POLQ	polymerase (DNA directed), theta	442.118	308.9	0.698681	1.08172e-05
ALKBH2	alkB, alkylation repair homolog 2 (E. coli)	427.054	302.436	0.708192	0.000379741
FANCE	Fanconi anemia, complementation group E	171.157	121.873	0.712054	0.00278919
MLH1	mutL homolog 1, colon cancer, nonpolyposis type 2 (E. coli)	1944.13	1385.22	0.712512	0.000397302
MSH2	mutS homolog 2, colon cancer, nonpolyposis type 1 (E. coli)	934.795	666.908	0.713427	0.010274
TYMS	thymidylate synthetase	4458.57	3223.8	0.723056	0.00324095
POLA1	polymerase (DNA directed), alpha 1	521.473	377.286	0.7235	0.00209687
APEX2	APEX nuclease (apurinic/apyrimidinic endonuclease) 2	758.281	551.1	0.726775	0.00134773
UNG	uracil-DNA glycosylase	2174.15	1593.98	0.73315	0.00858843
POLE	polymerase (DNA directed), epsilon	778.927	571.269	0.733405	0.0066986
RTEL1	regulator of telomere elongation helicase 1	380.723	281.431	0.739203	0.00307773
RFC5	replication factor C (activator 1) 5, 36.5kDa	1645.49	1217.15	0.739687	0.00358723
BCCIP	BRCA2 and CDKN1A interacting protein	230.157	170.432	0.740503	0.0144899
BARD1	BRCA1 associated RING domain 1	697.582	516.842	0.740904	0.000566747
OBFC2B	oligonucleotide/oligosaccharide-binding fold containing 2B	720.424	534.411	0.7418	0.0197514
UIMC1	ubiquitin interaction motif containing 1	737.089	556.25	0.754657	0.000190132
POLD3	polymerase (DNA-directed), delta 3, accessory subunit	732.222	556.875	0.760527	0.000145285
EME1	essential meiotic endonuclease 1 homolog 1 (S. pombe)	261.326	199.762	0.764416	0.00110167
FANCA	Fanconi anemia, complementation group A	364.628	279.704	0.767094	0.00307666
MUM1	melanoma associated antigen (mutated) 1	228.688	175.959	0.76943	4.58619e-05
MAD2L2	MAD2 mitotic arrest deficient-like 2 (yeast)	1732.69	1333.28	0.769488	0.00613184
RPA1	replication protein A1, 70kDa	3108.03	2392.82	0.769883	0.00598411
LIG3	ligase III, DNA, ATP-dependent	508.399	392.883	0.772785	0.00269604
DCLRE1B	DNA cross-link repair 1B (PSO2 homolog, S. cerevisiae)	596.2	463.999	0.778261	0.000692707
NEIL3	nei endonuclease VIII-like 3 (E. coli)	296.317	230.665	0.778441	0.00451829
DCLRE1C	DNA cross-link repair 1C (PSO2 homolog, S. cerevisiae)	252.774	197.156	0.779969	0.0261214
USP3	ubiquitin specific peptidase 3	1902.98	1484.41	0.780043	0.0153129
FANCM	Fanconi anemia, complementation group M	124.318	97.5781	0.784907	0.118101
GTF2H4	general transcription factor IIH, polypeptide 4, 52kDa	239.691	189.159	0.789181	0.0327116
DNA2	DNA replication helicase 2 homolog (yeast)	476.827	379.754	0.796419	0.035772
C15orf42	chromosome 15 open reading frame 42	261.769	208.704	0.797283	0.0260726
PMS1	PMS1 postmeiotic segregation increased 1 (S. cerevisiae)	561.334	448.122	0.798316	0.0175543
RAD51L3	RAD51-like 3 (S. cerevisiae)	139.087	111.08	0.798638	0.0115553
RPS27L	ribosomal protein S27-like	6281.65	5033.53	0.801307	0.0111452
APEX1	APEX nuclease (multifunctional DNA repair enzyme) 1	5254.17	4271.45	0.812964	0.00380309
RAD51AP1	RAD51 associated protein 1	493.854	406.484	0.823085	0.122173
RAD18	RAD18 homolog (S. cerevisiae)	374.72	308.556	0.823432	0.0166055
FANCF	Fanconi anemia, complementation group F	495.806	409.834	0.826602	0.0549241
MUS81	MUS81 endonuclease homolog (S. cerevisiae)	1128.6	934.264	0.827811	0.0368469
SMUG1	single-strand-selective monofunctional uracil-DNA glycosylase 1	239.028	199.536	0.83478	0.0219224
MUTYH	mutY homolog (E. coli)	342.799	287.292	0.838078	0.00144673
TOPBP1	topoisomerase (DNA) II binding protein 1	1163.06	975.469	0.838706	0.141407
C20orf29	chromosome 20 open reading frame 29	312.705	263.216	0.841739	0.000694389
RAD9A	RAD9 homolog A (S. pombe)	987.869	831.902	0.842118	0.0738002
PALB2	partner and localizer of BRCA2	638.227	538.562	0.843842	0.0761561
NEIL2	nei like 2 (E. coli)	196.597	166.252	0.845649	0.0913011
TNP1	transition protein 1 (during histone to protamine replacement)	54.8404	46.568	0.849154	0.0116341
MEN1	multiple endocrine neoplasia I	1270.2	1079.19	0.849626	0.0562967
MDC1	mediator of DNA damage checkpoint 1	546.049	464.145	0.850006	0.201654
TOP2A	topoisomerase (DNA) II alpha 170kDa	2114.18	1801.23	0.851976	0.324163
SSRP1	structure specific recognition protein 1	1169.14	1005.23	0.859797	0.0887867
SMC6	structural maintenance of chromosomes 6	899.114	773.957	0.8608	0.0946154
EYA2	eyes absent homolog 2 (Drosophila)	36.5308	31.4625	0.861259	0.195198
PNKP	polynucleotide kinase 3'-phosphatase	704.603	608.419	0.863493	0.133394
CHRNA4	cholinergic receptor, nicotinic, alpha 4	48.7303	42.4933	0.872011	0.119009
RAD1	RAD1 homolog (S. pombe)	1468.72	1282.01	0.872872	0.110123
RAD50	RAD50 homolog (S. cerevisiae)	705.925	617.3	0.874455	0.1501
SETMAR	SET domain and mariner transposase fusion gene	194.209	170.015	0.875421	0.17529
MBD4	methyl-CpG binding domain protein 4	2948.41	2583.62	0.876277	0.253845
REV1	REV1 homolog (S. cerevisiae)	484.391	425.174	0.877751	0.056349
RNF8	ring finger protein 8	451.333	396.849	0.879282	0.126195
NSMCE1	non-SMC element 1 homolog (S. cerevisiae)	1789.89	1576.26	0.880651	0.109963
RBBP8	retinoblastoma binding protein 8	1050.72	928.007	0.883214	0.170102
ERCC1	excision repair cross-complementing rodent repair deficiency, complementation group 1 (includes overlapping antisense sequence)	1379.38	1219.54	0.884123	0.0499036
RAD51L1	RAD51-like 1 (S. cerevisiae)	246.56	218.037	0.884315	0.176387
RPA2	replication protein A2, 32kDa	1412.07	1253.81	0.887919	0.00852974
NTHL1	nth endonuclease III-like 1 (E. coli)	591.961	527.227	0.890645	0.152305
BRE	brain and reproductive organ-expressed (TNFRSF1A modulator)	1204.77	1073.69	0.891196	0.124872
POLN	polymerase (DNA directed) nu	40.3909	36.0085	0.8915	0.0410653
DCLRE1A	DNA cross-link repair 1A (PSO2 homolog, S. cerevisiae)	244.3	217.935	0.892079	0.0662813
DDB1	damage-specific DNA binding protein 1, 127kDa	2354.93	2101.55	0.892407	0.172182
CLSPN	claspin homolog (Xenopus laevis)	45.365	40.6402	0.895849	0.050829
APITD1	apoptosis-inducing, TAF9-like domain 1	892.283	803.761	0.900792	0.20655
NEIL1	nei endonuclease VIII-like 1 (E. coli)	115.872	104.385	0.900862	0.199593
USP1	ubiquitin specific peptidase 1	2930.5	2643.51	0.902067	0.255753
STRA13	stimulated by retinoic acid 13 homolog (mouse)	6377.42	5755.71	0.902515	0.141603
GTF2H3	general transcription factor IIH, polypeptide 3, 34kDa	339.381	306.954	0.904452	0.508414
PARP1	poly (ADP-ribose) polymerase family, member 1	2591.54	2344.76	0.904776	0.28527
MSH6	mutS homolog 6 (E. coli)	2672.77	2421.22	0.905885	0.28042
SUPT16H	suppressor of Ty 16 homolog (S. cerevisiae)	2428.91	2214.13	0.911575	0.396019
HUS1	HUS1 checkpoint homolog (S. pombe)	618.688	564.18	0.911898	0.0739658
C2orf13	chromosome 2 open reading frame 13	26.2357	23.9367	0.912372	0.161719
C19orf40	chromosome 19 open reading frame 40	138.528	126.393	0.912401	0.263092
C10orf78	chromosome 10 open reading frame 78	218.273	199.263	0.912907	0.437761
WRN	Werner syndrome	221.122	202.407	0.915362	0.281377
BRIP1	BRCA1 interacting protein C-terminal helicase 1	721.94	661.503	0.916285	0.639992
RNF168	ring finger protein 168	1274.32	1167.86	0.916456	0.261466
EYA3	eyes absent homolog 3 (Drosophila)	637.952	586.129	0.918767	0.0573629
ZSWIM7	zinc finger, SWIM-type containing 7	478.677	441.61	0.922565	0.377908
SFPQ	splicing factor proline/glutamine-rich (polypyrimidine tract binding protein associated)	3794.85	3504.73	0.923549	0.525014
EYA1	eyes absent homolog 1 (Drosophila)	38.3193	35.4546	0.925241	0.426883
POLG2	polymerase (DNA directed), gamma 2, accessory subunit	670.297	620.813	0.926176	0.204324
PRPF19	PRP19/PSO4 pre-mRNA processing factor 19 homolog (S. cerevisiae)	1513.85	1406.05	0.928792	0.316555
CEP164	centrosomal protein 164kDa	544.19	506.083	0.929976	0.490426
ALKBH3	alkB, alkylation repair homolog 3 (E. coli)	302.271	281.25	0.930458	0.283586
FANCD2	Fanconi anemia, complementation group D2	1126.41	1058.39	0.93962	0.540327
POLH	polymerase (DNA directed), eta	147.096	138.434	0.941113	0.38229
CHD1L	chromodomain helicase DNA binding protein 1-like	3128.14	2944.65	0.941343	0.323799
C9orf80	chromosome 9 open reading frame 80	1897.59	1788.43	0.942472	0.66481
BTBD12	BTB (POZ) domain containing 12	160.48	151.313	0.942878	0.386448
XRCC1	X-ray repair complementing defective repair in Chinese hamster cells 1	557.275	527.323	0.946254	0.409933
PMS2L4	postmeiotic segregation increased 2-like 4	17.021	16.1168	0.946878	0.164271
PARP4	poly (ADP-ribose) polymerase family, member 4	723.737	685.636	0.947355	0.494843
PTTG1	pituitary tumor-transforming 1	4672.49	4435.93	0.949372	0.304368
RAD51C	RAD51 homolog C (S. cerevisiae)	5970.71	5710.08	0.956348	0.406541
RPA4	replication protein A4, 34kDa	21.8475	20.9494	0.958892	0.305062
H2AFX	H2A histone family, member X	8869.69	8510.99	0.959559	0.462119
EYA4	eyes absent homolog 4 (Drosophila)	17.1126	16.4735	0.962655	0.59206
TDP1	tyrosyl-DNA phosphodiesterase 1	1682.41	1619.66	0.962701	0.511532
USP10	ubiquitin specific peptidase 10	1510.7	1455.33	0.963346	0.586124
APTX	aprataxin	785.889	757.359	0.963698	0.598846
IMPG1	interphotoreceptor matrix proteoglycan 1	12.6223	12.2279	0.968755	0.618071
FTO	fat mass and obesity associated	590.734	572.297	0.968789	0.733908
FBXO6	F-box protein 6	645.573	625.679	0.969184	0.60079
ZFYVE26	zinc finger, FYVE domain containing 26	162.402	157.704	0.971072	0.72717
NPM1	nucleophosmin (nucleolar phosphoprotein B23, numatrin)	9259.08	9115.91	0.984537	0.750339
RAD23A	RAD23 homolog A (S. cerevisiae)	2474.03	2448.32	0.98961	0.887575
WRNIP1	Werner helicase interacting protein 1	1232.26	1220.04	0.990084	0.916531
MIZF	MBD2-interacting zinc finger	588.071	582.914	0.99123	0.786144
HMGB2	high-mobility group box 2	6183.1	6135.57	0.992312	0.905591
BRCC3	BRCA1/BRCA2-containing complex, subunit 3	990.077	982.889	0.992741	0.912337
MLH3	mutL homolog 3 (E. coli)	437.178	434.09	0.992936	0.933818
XAB2	XPA binding protein 2	71.9265	71.5431	0.99467	0.881575
FANCC	Fanconi anemia, complementation group C	162.594	161.965	0.996134	0.953813
ERCC8	excision repair cross-complementing rodent repair deficiency, complementation group 8	333.55	333.088	0.998614	0.989844
ALKBH1	alkB, alkylation repair homolog 1 (E. coli)	898.403	898.253	0.999833	0.996696
ERCC6	excision repair cross-complementing rodent repair deficiency, complementation group 6	51.6169	51.7341	1.00227	0.983075
CDC14B	CDC14 cell division cycle 14 homolog B (S. cerevisiae)	104.824	105.321	1.00473	0.950871
USP28	ubiquitin specific peptidase 28	243.194	245.653	1.01011	0.922321
POLL	polymerase (DNA directed), lambda	219.201	222.688	1.01591	0.731824
HMGB1	high-mobility group box 1	14508.9	14822.7	1.02162	0.5864
XRCC5	X-ray repair complementing defective repair in Chinese hamster cells 5 (double-strand-break rejoining; Ku autoantigen, 80kDa)	5677.37	5807.52	1.02292	0.757621
STUB1	STIP1 homology and U-box containing protein 1	11404.9	11680.4	1.02415	0.541433
VCP	valosin-containing protein	2490.78	2551.98	1.02457	0.628441
ATR	ataxia telangiectasia and Rad3 related	585.805	601.866	1.02742	0.819453
RPA3	replication protein A3, 14kDa	5049.62	5209.43	1.03165	0.611803
TREX2	three prime repair exonuclease 2	30.566	31.5647	1.03267	0.556842
MGMT	O-6-methylguanine-DNA methyltransferase	1223.91	1268.65	1.03655	0.679444
FZR1	fizzy/cell division cycle 20 related 1 (Drosophila)	254.492	264.41	1.03897	0.611273
MTMR15	myotubularin related protein 15	172.448	179.738	1.04227	0.619589
XRCC6	X-ray repair complementing defective repair in Chinese hamster cells 6 (Ku autoantigen, 70kDa)	7695.65	8026.66	1.04301	0.358875
PAXIP1	PAX interacting (with transcription-activation domain) protein 1	816.156	852.507	1.04454	0.659719
EME2	essential meiotic endonuclease 1 homolog 2 (S. pombe)	1057.14	1105.83	1.04606	0.649787
RBX1	ring-box 1	4253.34	4453.38	1.04703	0.292458
HUWE1	HECT, UBA and WWE domain containing 1	8264.11	8696.93	1.05237	0.22576
ATM	ataxia telangiectasia mutated	119.926	126.979	1.05881	0.306219
SMC3	structural maintenance of chromosomes 3	1401.09	1485.48	1.06023	0.64606
TTC5	tetratricopeptide repeat domain 5	270.999	287.531	1.06101	0.400249
RAD52	RAD52 homolog (S. cerevisiae)	71.0948	75.7988	1.06617	0.452277
UBE2N	ubiquitin-conjugating enzyme E2N (UBC13 homolog, yeast)	4613.28	4955.07	1.07409	0.125081
C9orf102	chromosome 9 open reading frame 102	58.4091	62.7488	1.0743	0.366907
C11orf30	chromosome 11 open reading frame 30	756.981	813.593	1.07479	0.406133
MMS19	MMS19 nucleotide excision repair homolog (S. cerevisiae)	700.97	754.042	1.07571	0.312674
MORF4L1	mortality factor 4 like 1	5463.78	5951.56	1.08928	0.249062
NONO	non-POU domain containing, octamer-binding	8688.33	9478.49	1.09095	0.0687704
GEN1	Gen homolog 1, endonuclease (Drosophila)	200.881	219.523	1.0928	0.527765
RAD23B	RAD23 homolog B (S. cerevisiae)	8649.04	9525.9	1.10138	0.302846
MORF4L2	mortality factor 4 like 2	10818.8	11953.8	1.10491	0.197211
GIYD2	GIY-YIG domain containing 2	1719.82	1913.82	1.1128	0.212129
CUL4A	cullin 4A	773.184	861.129	1.11374	0.22307
SOD1	superoxide dismutase 1, soluble (amyotrophic lateral sclerosis 1 (adult))	11504.4	12903.8	1.12164	0.101341
NSMCE2	non-SMC element 2, MMS21 homolog (S. cerevisiae)	1583.4	1777.3	1.12246	0.0823365
GTF2H2	general transcription factor IIH, polypeptide 2, 44kDa	1520.67	1712.97	1.12646	0.205725
SMC1A	structural maintenance of chromosomes 1A	2141.62	2414.52	1.12743	0.271491
PRKDC	protein kinase, DNA-activated, catalytic polypeptide	1574.71	1786.67	1.1346	0.38414
INTS3	integrator complex subunit 3	872.007	991.912	1.13751	0.0972612
CINP	cyclin-dependent kinase 2-interacting protein	163.302	185.972	1.13882	0.200342
HERC2	hect domain and RLD 2	302.374	346.013	1.14432	0.334214
TDG	thymine-DNA glycosylase	2496.85	2860.48	1.14563	0.104328
ERCC3	excision repair cross-complementing rodent repair deficiency, complementation group 3 (xeroderma pigmentosum group B complementing)	872.41	1002.76	1.14941	0.0356844
UBE2D3	ubiquitin-conjugating enzyme E2D 3 (UBC4/5 homolog, yeast)	6399.32	7382.78	1.15368	0.0517685
UBE2A	ubiquitin-conjugating enzyme E2A (RAD6 homolog)	4618.63	5350.59	1.15848	0.0311444
PSMC5	proteasome (prosome, macropain) 26S subunit, ATPase, 5	9875.62	11504.6	1.16495	0.0046935
KIN	KIN, antigenic determinant of recA protein homolog (mouse)	848.466	989.525	1.16625	0.157615
PMS2	PMS2 postmeiotic segregation increased 2 (S. cerevisiae)	586.168	689.092	1.17559	0.0284181
MSH3	mutS homolog 3 (E. coli)	372.64	438.219	1.17599	0.0795833
PRMT6	protein arginine methyltransferase 6	3462.57	4073.1	1.17632	0.174223
TREX1	three prime repair exonuclease 1	350.499	413.231	1.17898	0.0131571
NBN	nibrin	2686.21	3171.9	1.18081	0.0792124
TP53BP1	tumor protein p53 binding protein 1	625.855	741.122	1.18417	0.0531787
WDR33	WD repeat domain 33	1808.98	2156.31	1.192	0.00938721
POLM	polymerase (DNA directed), mu	122.333	146.143	1.19463	0.0168626
POLB	polymerase (DNA directed), beta	1014.01	1214.95	1.19816	0.00197687
NHEJ1	nonhomologous end-joining factor 1	193.062	232.673	1.20517	0.0215113
HTATIP	HIV-1 Tat interacting protein, 60kDa	651.183	786.093	1.20718	0.00211288
DDX1	DEAD (Asp-Glu-Ala-Asp) box polypeptide 1	3230.32	3907.77	1.20972	0.0181635
RAD21	RAD21 homolog (S. pombe)	3979.94	4826.6	1.21273	0.0763534
KIAA0415	KIAA0415	181.661	221.004	1.21657	0.00643585
SETX	senataxin	427.154	520.684	1.21896	0.0890607
FANCL	Fanconi anemia, complementation group L	711.574	868.977	1.2212	0.0649154
XRCC6BP1	XRCC6 binding protein 1	637.285	781.201	1.22583	0.0145454
SMG1	PI-3-kinase-related kinase SMG-1	554.42	686.671	1.23854	0.0579244
CETN2	centrin, EF-hand protein, 2	3282.6	4107.88	1.25141	0.00285536
UBE2B	ubiquitin-conjugating enzyme E2B (RAD6 homolog)	2238.97	2814.43	1.25702	0.0184354
NCOA6	nuclear receptor coactivator 6	746.427	938.642	1.25751	0.0878135
REV3L	REV3-like, catalytic subunit of DNA polymerase zeta (yeast)	594.465	754.493	1.2692	0.0565882
CDK7	cyclin-dependent kinase 7	1383.95	1756.58	1.26926	0.00322024
MPG	N-methylpurine-DNA glycosylase	1311.18	1666.5	1.27099	0.000125636
ERCC5	excision repair cross-complementing rodent repair deficiency, complementation group 5 (xeroderma pigmentosum, complementation group G (Cockayne syndrome))	208.359	267.892	1.28572	0.0298858
C19orf62	chromosome 19 open reading frame 62	1290.18	1662.36	1.28847	0.00436692
GTF2H5	general transcription factor IIH, polypeptide 5	1469.02	1902.46	1.29505	0.000907048
EPC2	enhancer of polycomb homolog 2 (Drosophila)	502.919	662.493	1.3173	0.0308234
OBFC2A	oligonucleotide/oligosaccharide-binding fold containing 2A	503.762	664.36	1.3188	0.00177301
POLI	polymerase (DNA directed) iota	306.528	416.649	1.35926	0.0189977
CCDC98	coiled-coil domain containing 98	326.643	448.919	1.37434	0.00815576
USP47	ubiquitin specific peptidase 47	167.916	231.672	1.37969	0.0468904
XPA	xeroderma pigmentosum, complementation group A	316.795	440.295	1.38984	0.00105243
SHPRH	SNF2 histone linker PHD RING helicase	57.7125	82.4492	1.42862	0.0793121
GTF2H1	general transcription factor IIH, polypeptide 1, 62kDa	613.964	904.412	1.47307	0.00260537
PMS2L5	postmeiotic segregation increased 2-like 5	145.107	214.203	1.47617	0.000265736
CUL4B	cullin 4B	881.535	1323.3	1.50113	0.00125459
ATRX	alpha thalassemia/mental retardation syndrome X-linked (RAD54 homolog, S. cerevisiae)	738.069	1129.32	1.5301	0.00212377
JMY	junction-mediating and regulatory protein	619.565	964.393	1.55656	0.00111698
ERCC4	excision repair cross-complementing rodent repair deficiency, complementation group 4	121.975	192.5	1.5782	0.00204326
POLK	polymerase (DNA directed) kappa	304.723	515.185	1.69067	0.00123814
ERCC2	excision repair cross-complementing rodent repair deficiency, complementation group 2 (xeroderma pigmentosum D)	193.934	330.171	1.70249	5.48366e-05
RRM2B	ribonucleotide reductase M2 B (TP53 inducible)	962.086	1790.17	1.86072	0.00113388
LIG4	ligase IV, DNA, ATP-dependent	216.367	426.908	1.97307	0.000128867
