# Supplementary material for: FOXP3 Regulates Sensitivity of Cancer Cells to Irradiation by Transcriptional Repression of BRCA1
Source: Oxford University Press journal article supplement (doi:10.1158/0008-5472.can-12-2481), 2013-01-14
Supplement: 00085472can122481-sup-supplementary_table_s2_xls_file_-_12k.xlsx [file 00085472can122481-sup-supplementary_table_s2_xls_file_-_12k.xlsx]

## Sheet: Sheet1
Supplemental Table 2. mRNA expression analysis of DNA repair genes among FOXP3 direct targets
	DNA repair functions	FOXP3 (-) average	FOXP3 (+) average	Fold change FOXP3 (+) / (-)	p value
RBM14	Interacting with DNA-PK activator TRBP	1745.67	893.355	0.511755	7.28111e-05
CHAF1A	Mismatch repair	500.569	263.439	0.526278	0.00034763
BRCA1	non-homologous endjoint and homologous recombination repairs	666.396	369.95	0.55515	0.000465852
RAD54B	Homologous recombination repair of double strand break	880.074	495.092	0.562557	9.61286e-05
NFKBIL2	Homologous recombination repair of double strand break	391.699	225.979	0.57692	0.00031081
POLD1	Nucleotide excision repair	1033.6	606.922	0.587193	0.000573148
DDB2	Nucleotide excision repair	937.614	586.842	0.625888	0.000157933
LIG1	Base excision repair	1420.21	926.614	0.652448	0.00604575
FEN1	Long patch base excision repair	2027.48	1367.43	0.674449	0.000155473
POLD3	Nucleotide excision repair	732.222	556.875	0.760527	0.000145285
JMY	Promote P53 response to DNA damage	619.565	964.393	1.55656	0.00111698
PAXIP1	aka TPIP, regulates 53BP1 in DNA damage response	53.3614	92.7421	1.738	0.000352767
RRM2B	P53 checkpoint of damaged DNA response	962.086	1790.17	1.86072	0.00113388
