# Supplementary material for: FOXP3 Regulates Sensitivity of Cancer Cells to Irradiation by Transcriptional Repression of BRCA1
Source: Oxford University Press journal article supplement (doi:10.1158/0008-5472.can-12-2481), 2013-01-14
Supplement: 00085472can122481-sup-supplementary_table_s4_xls_file_-_19k.xlsx [file 00085472can122481-sup-supplementary_table_s4_xls_file_-_19k.xlsx]

## Sheet: Sheet1
Primers for experiments
hFOXP3 realtime Sense			CTTCAAGTTCCACAACATGCGTCC
hFOXP3 realtime antisence			TAGATCTCATTGAGTGTCCGCTGC
mFOXP3 realtime Sense			AAAAGGAGAAGCTGGGAGCTA
mFOXP3 realtime antisence			TGAGTACTGGTGGCTACGATG
hBRCA1 realtime Sense			CTAACCTTGGAACTGTGAGAACTCTGAG
hBRCA1 realtime antisence			CTGATTTCATCCCTGGTTCCTTGAG
mBrca1 realtime Sense			CTGGAAGCTGTGCTGGAGCAGCGTGGGA
mBrca1 realtime antisence			CAAGAGTGGCCACATCGATATAGTCAAG
BRCA1P Forward			AAGTACGCGTCTGAACCACAGACTCTCCAACTCT
BRCA1P Reverse			ACACTCGAGGCTCTCATCTCTGGATCCTCCTCAAGCAC
BRCA1-ChIP-1 Forward			CATATTTCATTACATACTAAATATTTA
BRCA1-ChIP-1 Reverse			TCCTGGGTTGGTTAATTGTATCATTAGCAG
BRCA1-ChIP-2 Forward			CTGCTAATGATACAATTAACAACCCAGGA
BRCA1-ChIP-2 Reverse			CTTTCAATTTGCATTGTTCTGACCACCAG
BRCA1-ChIP-3 Forward			GAAGTGGGAGATTCTAGCTTAGCTGGAC
BRCA1-ChIP-3 Reverse			CAGCTATCTGACTCTACTGGCTGTAGAC
BRCA1-ChIP-4 Forward			GTCGGTGTTACCAGCAGATAAATGCTATG
BRCA1-ChIP-4 Reverse			GTTCTTGTGCTCTTTGCAATAAATC
BRCA1-ChIP-5 Forward			GAATTGTAGTCTCCTAAAGAGTTGTAC
BRCA1-ChIP-5 Reverse			CTTGTACTTGTCAACAGTTATGGACTGGAG
BRCA1-ChIP-6 Forward			AATTACAGATAAATTAAAACTGCGACTG
BRCA1-ChIP-6 Reverse			CTTCGGAAATCCACTCTCCCACGCCAGTAC
BRCA1-ChIP-7 Forward			GTATGTTCAGTAGTTAGAACGGTACTTG
BRCA1-ChIP-7 Reverse			GAATGTTACTCACTACTAACCATCACCAT
hFOXP3 shRNA sequence in lentivirus vector:
1	GCTTCATCTGTGGCATCATCC
2	GAGTCTGCACAAGTGCTTTGT
3	GCAGCGGACACTCAATGAG
mFOXP3 shRNA sequence in lentivirus vector PLKO.1 from openbiosystem, Catalogue number:RMM4534-NM_054039
1	CCACACCTCTTCTTCCTTGAA
2	CAATAGTTCCTTCCCAGAGTT
3	CTTTCACCTATGCCACCCTTA
4	GACCGTAGATGAATTTGAGTT
hFoxP3 SiRNA
1	UCGAAGAGCCAGAGGACUU
2	GCAGCGGACACUCAAUGAG
3	ACAACAUGGACUACUUCAA
4	UGAAGUAGUCCAUGUUGUG
SiRNA control
1	GUGCGCUGCUGGUGCCAAC
2	AAGCUGACCCUGAAGUUCA
SiRNA for human Brca1
1	AAGGAACCUGUCUCCACAAAGUU
2	AGAUAGUUCUACCAGUAAAdTdT
3	GGGAUACCAUGCAACAUAAUU
4	CAGGAAAUGGCUGAACUAGAA
SiRNA for mouse Brca1
1	GAACAAAGCUGGUUUAUUA
2	GGAGGAAAGUGGAUAGUUA
3	CUGAAGAGCUGCUGAGAAU
shRNA for mouse Brca1 in lentivirus vector pLKO.1 from openbiosystem, Catalogue number:RMM4534-NM_009764
1	CCTCACTTTAACTGACGCAAT
2	CCCATCATACTTTAATGTGTA
3	CCTTTGTGTAAGAATGAGATA
4	CCACAGGTAAATCAGGAATTT
5	GCTCAGTGTATGACTCAGTTT
